# Supplementary material for: Simultaneous Pre-Concentration and HPLC-MS/MS Quantification of Phycotoxins and Cyanotoxins in Inland and Coastal Waters
Source: PubMed Central journal article supplement (PMC7369962; doi:10.3390/ijerph17134782), 2020-07-03
Supplement: ijerph-17-04782-s001.pdf [file ijerph-17-04782-s001.pdf]

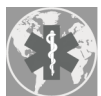

Supplementary Material

# Simultaneous Pre-concentration and HPLC-MS/MS Quantification of Phycotoxins and Cyanotoxins in Inland and Coastal Waters

Francesca Merlo <sup>1</sup>, Federica Maraschi <sup>1</sup>, Davide Piparo <sup>1</sup>, Antonella Profumo <sup>1,\*</sup> and Andrea Speltini <sup>2</sup>

<sup>1</sup> Department of Chemistry, University of Pavia, via Taramelli 12, 27100 Pavia and Italy; francesca.merlo02@universitadipavia.it (F.Me.); federica.maraschi@unipv.it (F.Ma.); davide.piparo01@universitadipavia.it (D.P.)

<sup>2</sup> Department of Drug Sciences, University of Pavia, via Taramelli 12, 27100 Pavia, Italy; andrea.speltini@unipv.it

\* Correspondence: antonella.profumo@unipv.it

**Table S1.** List of target microcystin (MC) variants.

| Microcystin | X        | Z          |
|-------------|----------|------------|
| MC-LR       | Leucine  | Arginine   |
| MC-LW       | Leucine  | Tryptophan |
| MC-RR       | Arginine | Arginine   |
| MC-YR       | Tyrosine | Arginine   |

**Table S2.** Physical-chemical parameters of the water samples.

|                                                             | Tap water | Mergozzo Lake Water | Garda Lake Water | Staffora River | Ligurian Sea Water |
|-------------------------------------------------------------|-----------|---------------------|------------------|----------------|--------------------|
| <i>pH</i>                                                   | 7.7       | 7.8                 | 7.1              | 7.9            | 8.1                |
| Conductivity at 20 °C ( $\mu\text{S cm}^{-1}$ )             | 270       | 59                  | 278              | 293            | $5 \times 10^4$    |
| <i>Cl</i> <sup>-</sup> ( $\text{mg L}^{-1}$ )               | 5.0       | 2.2                 | 13.3             | 3.9            | 19000              |
| <i>NO</i> <sub>3</sub> <sup>-</sup> ( $\text{mg L}^{-1}$ )  | 0.6       | 3.0                 | 9                | 1.6            | < 0.05             |
| <i>SO</i> <sub>4</sub> <sup>2-</sup> ( $\text{mg L}^{-1}$ ) | 5.0       | 6.0                 | 14.3             | 12.9           | 2650               |
| <i>Ca</i> <sup>2+</sup> ( $\text{mg L}^{-1}$ )              | 36.1      | 7.0                 | 39               | 54             | 400                |
| <i>Mg</i> <sup>2+</sup> ( $\text{mg L}^{-1}$ )              | 8.1       | 1.6                 | 7.2              | 7.8            | 1260               |
| <i>Na</i> <sup>+</sup> ( $\text{mg L}^{-1}$ )               | 12.5      | 2.7                 | 9.5              | 5.4            | 10600              |

**Table S3.** Mean recoveries (%) in tap water (500 mL, EF=200) at different concentration levels (400 and 100 ng L<sup>-1</sup>).

|       | Mean Recoveries (%)    |                        |
|-------|------------------------|------------------------|
|       | 400 ng L <sup>-1</sup> | 100 ng L <sup>-1</sup> |
| DA    | 80                     | 74                     |
| MC-RR | 101                    | 106                    |
| MC-YR | 119                    | 91                     |
| MC-LR | 116                    | 95                     |

|                          |    |     |
|--------------------------|----|-----|
| MC-LW                    | 76 | 70  |
| OA                       | 95 | 120 |
| RSD < 10%, <i>n</i> = 3. |    |     |

**Table S4.** Matrix effect (ME) (%) in environmental matrices for each analyte.

|       | Lake Water | River Water | Sea Water |
|-------|------------|-------------|-----------|
| DA    | 203        | 116         | 452       |
| MC-RR | 88         | 77          | 180       |
| MC-YR | 108        | 65          | 418       |
| MC-LR | 113        | 63          | 212       |
| MC-LW | 114        | 61          | 476       |
| OA    | 98         | 63          | 142       |

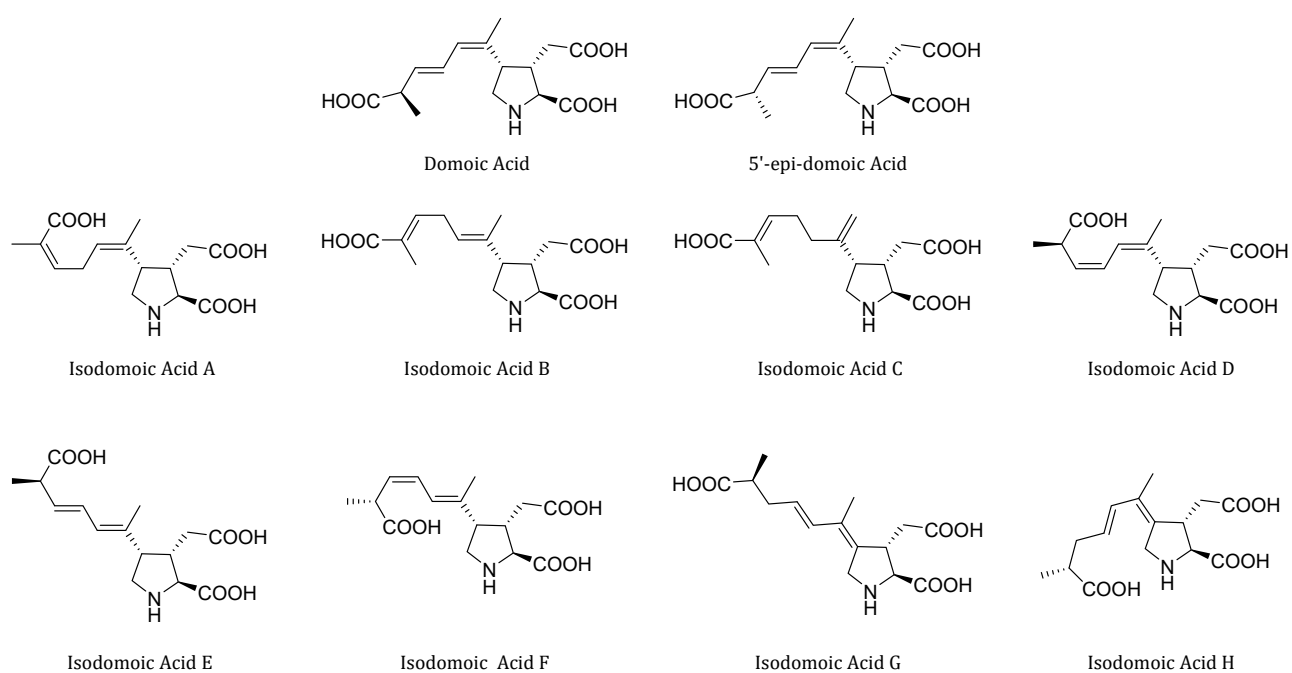**Figure S1.** Chemical Structure of domoic acid (DA) and its isomers.

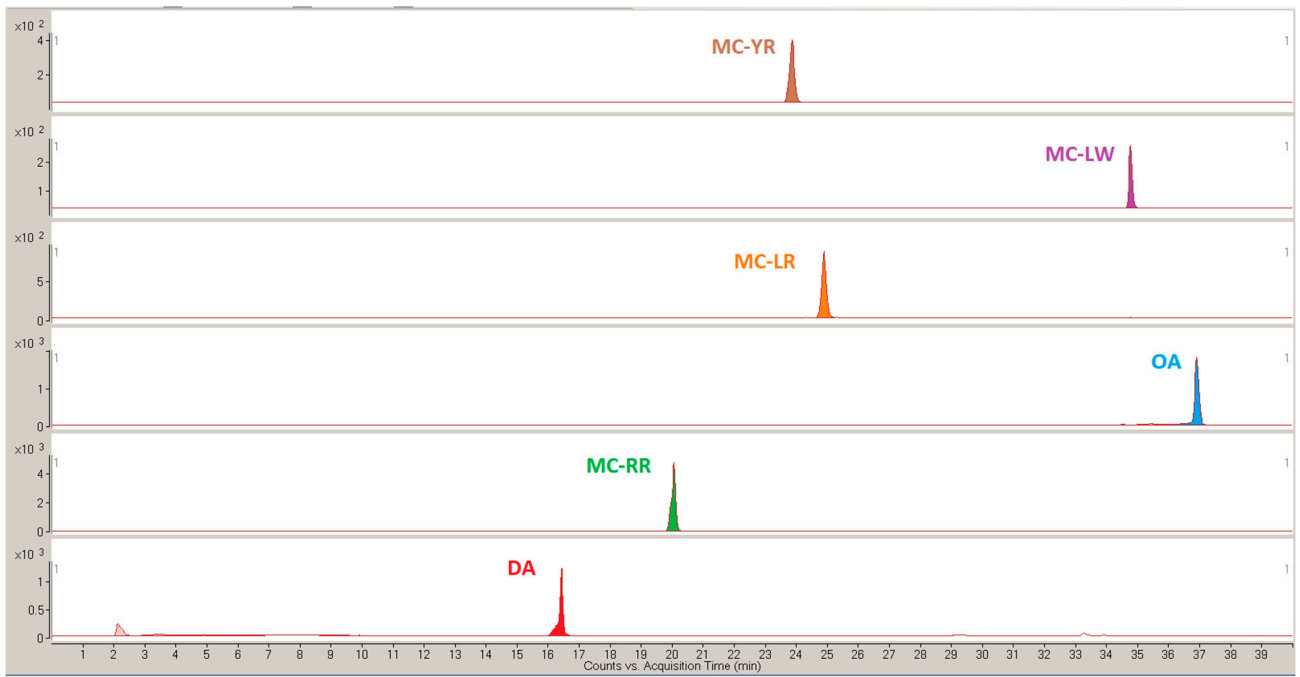

**Figure S2.** A typical Multiple Reaction Mode (MRM) chromatogram of a standard solution ( $200 \mu\text{g L}^{-1}$ ).
